# Supplementary material for: BOLD Coupling between Lesioned and Healthy Brain Is Associated with Glioma Patients’ Recovery
Source: MDPI journal article supplement (doi:10.3390/cancers13195008), 2021-10-06
Supplement: s1 [file s1]

Supplementary Materials

# BOLD Coupling between Lesioned and Healthy Brain Is Associated with Glioma Patients' Recovery

Rafael Romero-Garcia, Michael G. Hart, Richard A. I. Bethlehem, Ayan Mandal, Moataz Assem, Benedicto Crespo-Facorro, Juan Manuel Gorriz, Gladstone Austin Amos Burke, Stephen J. Price, Thomas Santarius, Yaara Erez and John Suckling

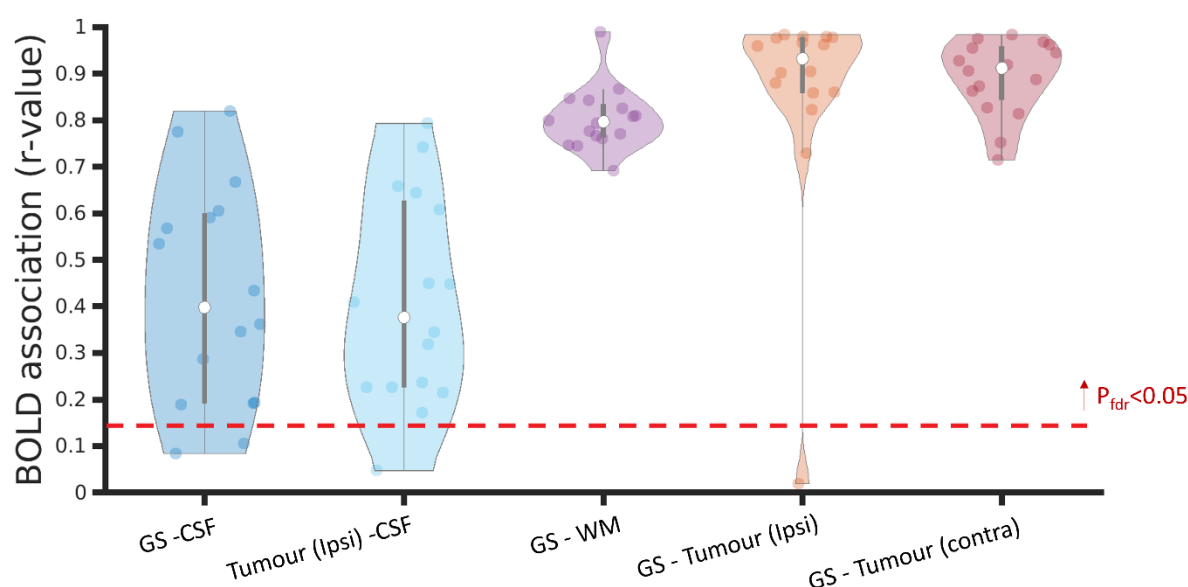

**Figure S1.** Correlation distribution across brain tumour patients (represented by individual dots) between BOLD signals derived from different tissue compartments: Gray Matter (that is, from which the GS is extracted), Cerebrospinal Fluid (CSF), White Matter (WM), Tumour (Tumour -ipsi-) and cortical regions contralateral to the tumour (Tumour -contra-). R-values over the dashed red line represent significant associations.

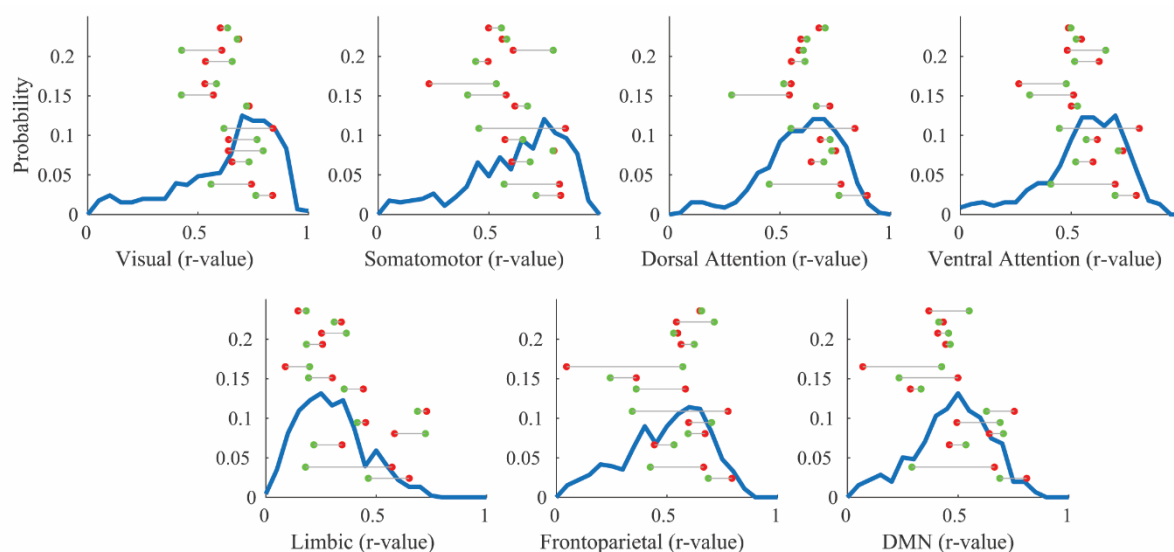

**Figure S2.** Average correlation within canonical networks in HC and brain tumour patients before and after surgery. Blue lines represent the distribution of the average correlation within each of the 7 canonical networks for 653 HCs. Individual

points illustrate the within network correlation for each brain tumour patient in the hemisphere containing the tumour before (red points), and immediately after surgery (green points). The Y-axis represents probability values only for HC, not for the individual points.

**Table S1.** Demographic and pathological information. # Number of patient; M, Male; F, Female; L, Left; R, Right; SFG, Superior Frontal Gyrus; MFG, Middle Frontal Gyrus; IFG, Inferior Frontal Gyrus; ITG, Inferior Temporal Gyrus; MTG, Middle Temporal Gyrus; SMA, Supplementary Motor Area; RT, radiotherapy; Astro – astrocytoma; GBM – glioblastoma multiforme; Oligo – oligodendroglioma; Lesion Vol Pre/Post – Total volume occupied by the tumour (Pre) and total amount of damaged tissue (Post) according to the lesion mask manually drawn on the MPRAGE image and refined with Unified Segmentation Lesion toolbox.

| #  | Age | Gender | Hand-<br>edness | Presen-tation | Hemi | Location                        | Histology<br>(WHO<br>grade) | Molecular<br>signature                     | Tumour/<br>Lesion Vol<br>(Pre/Post)<br>(cm <sup>3</sup> ) | Treat-<br>ment  |
|----|-----|--------|-----------------|---------------|------|---------------------------------|-----------------------------|--------------------------------------------|-----------------------------------------------------------|-----------------|
| 1  | 41  | F      | L               | Seizures      | L    | Frontal                         | Oligo (II)                  | IDH Mutated<br>1p19q Lost<br>ATRX Retained | 166.8<br>94.5                                             | Chemo-RT        |
| 2  | 32  | M      | R               | Seizures      | R    | Insula                          | Astro (II)                  | IDH WT<br>1p19q -<br>ATRX Lost             | 83.2<br>47.8                                              | Chemo-RT        |
| 3  | 26  | M      | R               | Seizures      | L    | Temporal /<br>Insula            | GBM (IV)                    | IDH Mutated<br>1p19q -<br>ATRX Lost        | 59.0<br>30.1                                              | Chemo-RT        |
| 4  | 49  | F      | R               | Incidental    | R    | Insula                          | Oligo (II)                  | IDH Mutated<br>1p19q Lost<br>ATRX Retained | 31.5<br>37.5                                              | Observatio<br>n |
| 5  | 55  | F      | R               | Recu-rrence   | L    | Frontal / SFG /<br>frontal pole | Oligo (II)                  | IDH Mutated<br>1p19q Lost<br>ATRX Retained | 21.1<br>43.4                                              | Observatio<br>n |
| 6  | 22  | F      | L               | Seizures      | R    | Frontal / IFG                   | Ganglio-<br>glioma (I)      | IDH -<br>1p19q -<br>ATRX -                 | 4.4<br>7.5                                                | Observatio<br>n |
| 7  | 29  | M      | R               | Seizures      | R    | Frontal / SFG &<br>MFG          | Astro (III)                 | IDH Mutated<br>1p19q Negative<br>ATRX Lost | 31.8<br>70.0                                              | Chemo-RT        |
| 8  | 29  | M      | R               | Seizures      | R    | Frontal / MFG                   | Astro (III)                 | IDH Mutated<br>1p19q Negative<br>ATRX Lost | 22.6<br>34.2                                              | Chemo-RT        |
| 9  | 50  | M      | L               | Seizures      | L    | Temporal / ITG                  | GBM (IV)                    | IDH WT<br>1p19q Negative<br>ATRX Retained  | 15.6<br>15.7                                              | Chemo-RT        |
| 10 | 38  | F      | R               | Seizures      | L    | Frontal / MFG                   | Oligo (II)                  | IDH Mutated<br>1p19q Lost<br>ATRX Retained | 34.7<br>54.9                                              | Chemo-RT        |
| 11 | 29  | M      | R               | Seizures      | L    | Frontal / SFG /<br>frontal pole | Astro (II)                  | IDH Mutated<br>1p19q Negative<br>ATRX Lost | 52.1<br>116.9                                             | Observatio<br>n |
| 12 | 33  | F      | R               | Head-aches    | L    | Temporal / MTG                  | Astro (III)                 | IDH Mutated<br>1p19q Negative<br>ATRX Lost | 87,0<br>84,8                                              | Chemo-RT        |
| 13 | 27  | F      | R               | Seizures      | L    | Superior<br>Temporal Gyrus      | Ganglioglio<br>ma (I)       | IDH WT<br>1p19q -<br>ATRX -                | 7.6<br>8.5                                                | Observatio<br>n |
| 14 | 56  | F      | R               | Seizures      | L    | Superior<br>Temporal Gyrus      | Astro (II)                  | IDH Mutated<br>1p19q Negative<br>ATRX Lost | 37.4<br>19.2                                              | Chemo-RT        |

|    |    |   |   |          |   |                         |             |                                           |              |          |
|----|----|---|---|----------|---|-------------------------|-------------|-------------------------------------------|--------------|----------|
| 15 | 32 | M | R | Seizures | L | Superior Temporal Gyrus | Astro (III) | IDH Mutated<br>1p19q - ATRX Lost          | 18.0<br>30.3 | Chemo-RT |
| 16 | 27 | M | R | Seizures | L | SFG/SMA & Pre-central   | GBM (IV)    | IDH WT<br>1p19q Negative<br>ATRX Retained | 73.6<br>43.7 | Chemo-RT |
| 17 | 30 | M | R | Seizures | L | Inferior frontal        | Astro (III) | IDH Mutated<br>1p19q - ATRX Lost          | 26.2<br>17.4 | Chemo-RT |

**Table S2.** MRI scans and neuropsychological assessments completed by each participant. # Number of patient.

| #  | MRI scanning  |                |               |               | Neuropsychological assessment |               |
|----|---------------|----------------|---------------|---------------|-------------------------------|---------------|
|    | Pre-operative | Post-operative | Month 3       | Month 12      | Pre-operative                 | Follow-up     |
| 1  | Completed     | Completed      | Completed     | Completed     | Completed                     | Completed     |
| 2  | Completed     | Not completed  | Completed     | Completed     | Completed                     | Not completed |
| 3  | Completed     | Completed      | Not completed | Not completed | Completed                     | Not completed |
| 4  | Completed     | Completed      | Completed     | Not completed | Completed                     | Completed     |
| 5  | Completed     | Completed      | Completed     | Completed     | Completed                     | Completed     |
| 6  | Completed     | Completed      | Completed     | Completed     | Completed                     | Completed     |
| 7  | Completed     | Completed      | Not completed | Completed     | Completed                     | Completed     |
| 8  | Completed     | Completed      | Completed     | Completed     | Completed                     | Completed     |
| 9  | Completed     | Completed      | Not completed | Not completed | Completed                     | Not completed |
| 10 | Completed     | Completed      | Completed     | Completed     | Completed                     | Completed     |
| 11 | Completed     | Completed      | Not completed | Not completed | Completed                     | Completed     |
| 12 | Completed     | Completed      | Completed     | Completed     | Completed                     | Completed     |
| 13 | Completed     | Completed      | Completed     | Not completed | Completed                     | Completed     |
| 14 | Completed     | Completed      | Completed     | Not completed | Completed                     | Completed     |
| 15 | Completed     | Completed      | Completed     | Completed     | Completed                     | Completed     |
| 16 | Completed     | Completed      | Completed     | Not completed | Completed                     | Completed     |
| 17 | Completed     | Completed      | Completed     | Completed     | Completed                     | Completed     |
